# Supplementary figures and images for: A Controlled Trial of Supported Employment for People With Severe Mental Illness and Justice Involvement
Source: Atypon-hosted journal article supplement (doi:10.1176/appi.ps.201400510), 2015-06-02

Figure 1. CONSORT Diagram

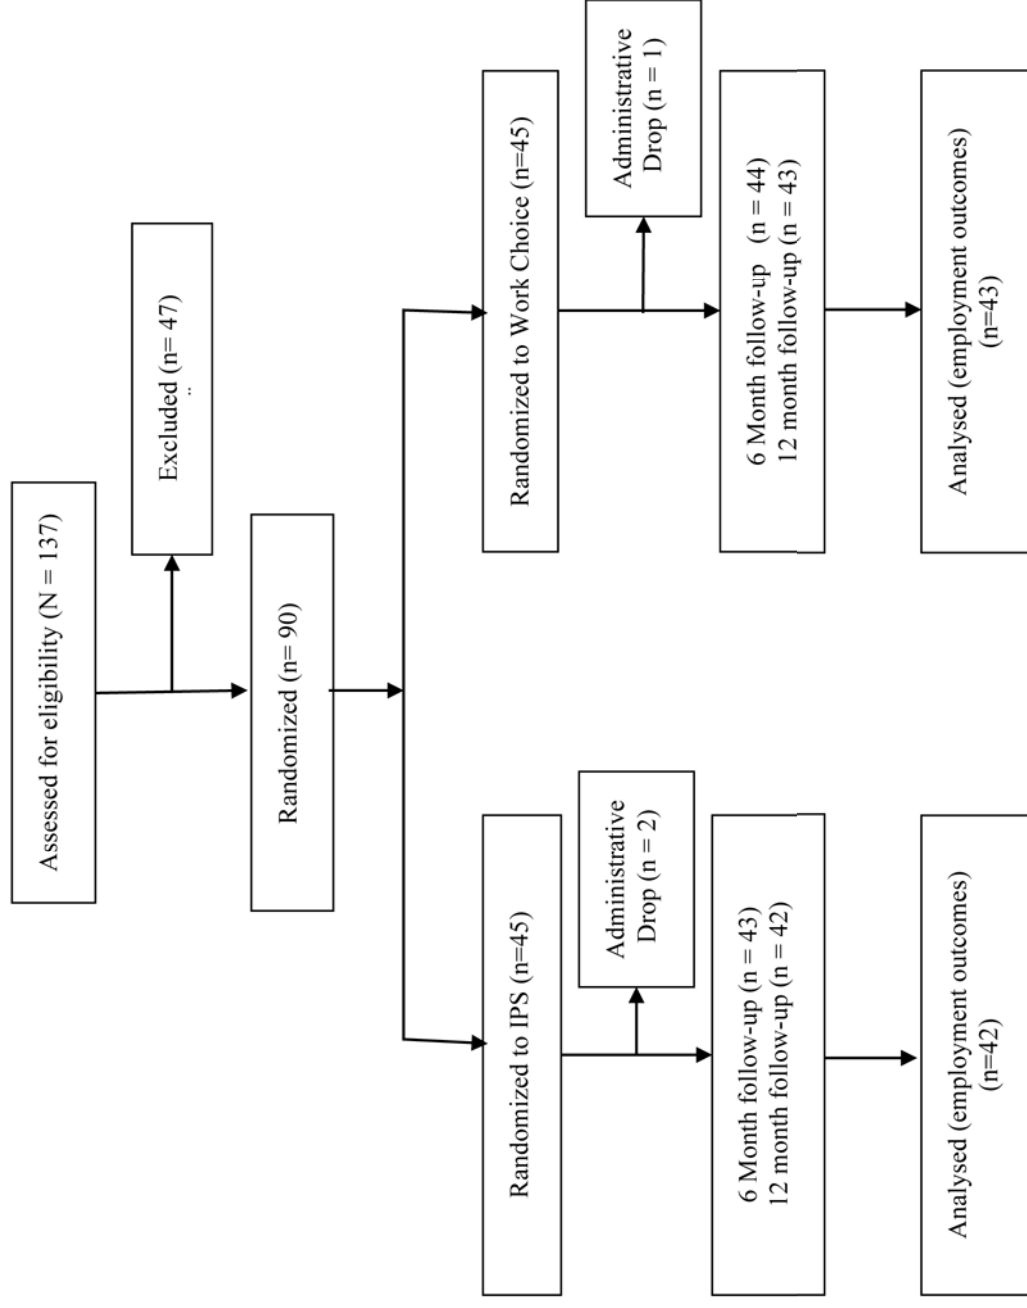

Supplement: appi.ps.201400510.ds001.pdf [file appi.ps.201400510.ds001.pdf]
